# Supplementary material
Source: publisher figshare collection journal article supplement (https://diabetesjournals.figshare.com/ndownloader/files/25521812)
Supplement: Supplementary file 1 [file 25521812]

## **Supplemental figure legends**

**Supplementary Figure S1- Evaluation of rubicon antibodies.** Samples from siControl and sirubicon were used. All antibodies detected bands suggested by the manufacturers, and the density of these detected bands was markedly decreased after rubicon knock down, confirming the specificity of the antibodies and existence of different rubicon variants.

**Supplementary Figure S2- Evaluation of rubicon and beclin-1 antibody for immunofluorescent staining.** After transient transfection beclin1 siRNA for 48 hours, beclin-1 expression was significantly decreased as shown in Westernblot and immunofluorescent staining.

**Supplementary Figure S3- Selective EGFR deletion in podocytes had no effect on body weight , fasting glucose and HbA1c in *db/db* mice.** *Egfr<sup>f/f</sup>; db/db* (*db/db*) mice and *nphs2-Cre; egfr<sup>f/f</sup>; db/db* (*egfr<sup>podKO</sup>; db/db*) had similar body weights, fasting blood glucose and HbA1c levels at 8 weeks old and 40 weeks old (8 weeks: n = 11 for *db/db* group and n = 12 for *egfr<sup>podKO</sup>; db/db* group; 40 weeks: n = 10 for *db/db* group and n = 12 for *egfr<sup>podKO</sup>; db/db* group). Two-tailed unpaired student's t -test.

**Supplementary Figure S4- Selective EGFR deletion in podocytes had no effect on body weight, fasting glucose and HbA1c in *nos3<sup>-/-</sup>; db/db* mice.** EGFR<sup>f/f</sup>; *nos3<sup>-/-</sup>; db/db* (*nos3<sup>-/-</sup>; db/db*) and nphs2-Cre; *egfr<sup>f/f</sup>; nos3<sup>-/-</sup>; db/db* (*egfr<sup>podKO</sup>; nos3<sup>-/-</sup>; db/db*) had similar body weights , fasting blood glucose and HbA1c levels at 8 weeks old and 20 weeks old (8 weeks: n = 19 for *nos3<sup>-/-</sup>; db/db* group and n = 25 for *egfr<sup>podKO</sup>; nos3<sup>-/-</sup>; db/db* group; 20 weeks: n = 16 for *nos3<sup>-/-</sup>; db/db* group and n = 22 for *egfr<sup>podKO</sup>; nos3<sup>-/-</sup>; db/db* group). Two-tailed unpaired student's t -test.

**Supplementary Figure S5- Selective EGFR deletion in podocytes led to decreased renal T lymphocyte infiltration in *nos3<sup>-/-</sup>; db/db* mice.** *egfr<sup>f/f</sup>; nos3<sup>-/-</sup>; db/db* (*nos3<sup>-/-</sup>; db/db*) and nphs2-Cre; *egfr<sup>f/f</sup>; nos3<sup>-/-</sup>; db/db* (*egfr<sup>podKO</sup>; nos3<sup>-/-</sup>; db/db*) were sacrificed at 20 weeks old. Podocyte EGFR deletion led to decreases in renal T lymphocyte infiltration, as indicated by CD3 staining, a marker of T lymphocytes. Original magnification: x 400.

**Supplementary Figure S6- Selective EGFR deletion in podocytes led to decreased renal oxidative stress.** *egfr<sup>f/f</sup>; nos3<sup>-/-</sup>; db/db* (*nos3<sup>-/-</sup>; db/db*) and nphs2-Cre; *egfr<sup>f/f</sup>; nos3<sup>-/-</sup>; db/db* (*egfr<sup>podKO</sup>; nos3<sup>-/-</sup>; db/db*) were sacrificed at 20 weeks old. Podocyte EGFR deletion led to decreased renal oxidative stress as indicated by decreased 4-HNE staining, a marker of oxidative stress. Original magnification: x 400.



**Supplementary Figure S7- Selective EGFR deletion in podocytes had no effect on macrophage M2 polarization.** *egfr<sup>ff</sup>; nos3<sup>-/-</sup>; db/db* (*nos3<sup>-/-</sup>; db/db*) and *nphs2-Cre; egfr<sup>ff</sup>; nos3<sup>-/-</sup>; db/db* (*egfr<sup>podKO</sup>; nos3<sup>-/-</sup>; db/db*) were sacrificed at 20 weeks old. Podocyte EGFR deletion had no effect on M2 polarization of macrophages, as indicated by comparable mRNA levels of M2 markers, including mannose receptor (Mrc1, CD206), IL4R $\alpha$ , arginase 1, YM1 and FIZZ1, in *nos3<sup>-/-</sup>; db/db* and *egfr<sup>podKO</sup>; nos3<sup>-/-</sup>; db/db* mice (n = 5 in each group). Two-tailed unpaired student's t -test.

**Supplementary Figure S8- Podocyte EGFR deficiency led to increased autophagy in podocytes in *nos3<sup>-/-</sup> db/db* mice.** Both *nos3<sup>-/-</sup>; db/db* (*nos3<sup>-/-</sup>; db/db*) mice and *nos3<sup>-/-</sup>; db/db* (*Egfr<sup>podKO</sup>; nos3<sup>-/-</sup>; db/db*) mice were sacrificed at 20 weeks old. Representative kidney sections were stained and indicated that podocyte EGFR deletion decreased SQSTM1 and protein expression and increased LC3b

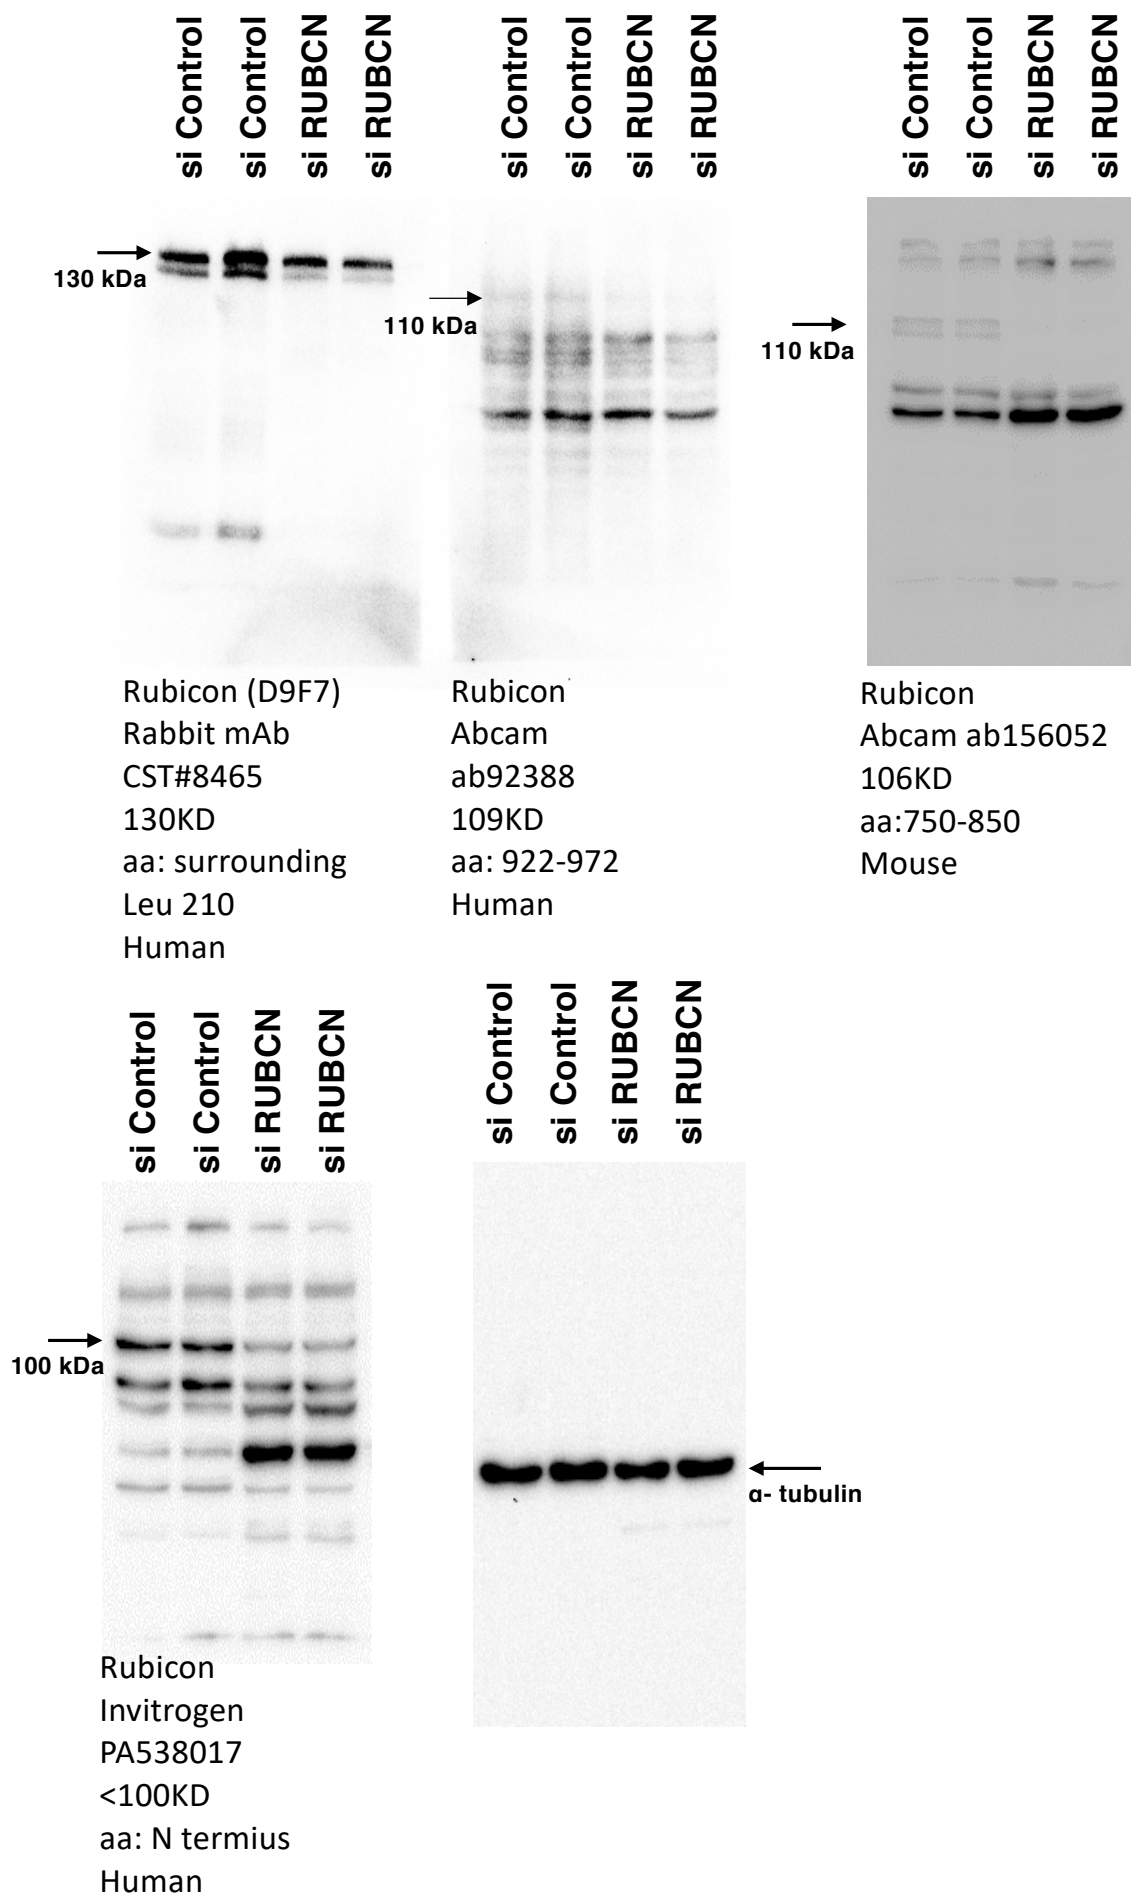

Supplemental Figure S1

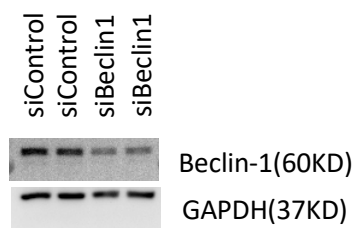

SignalSilence® Beclin-1 siRNA I #6222  
 Transfection 10nM siControl or siBeclin1 48 hour.

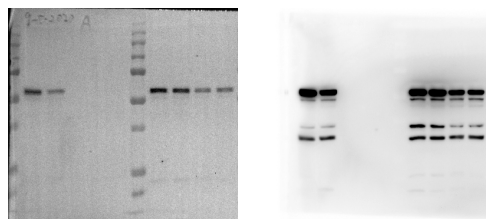

sFigure To confirm Belin-1 IF staining was specific  
 signaling but not background. Do beclin1 Knockdown  
 experiment.

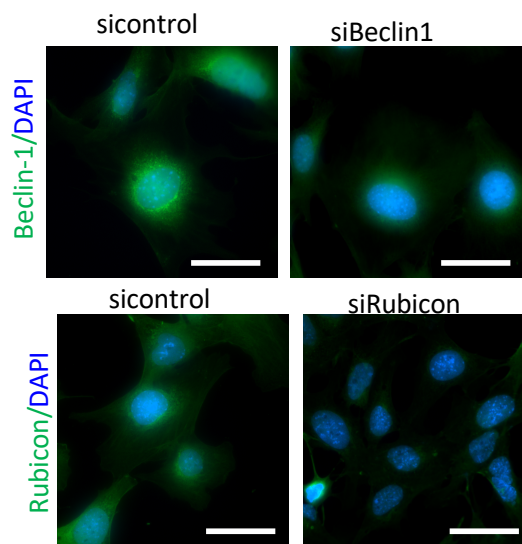

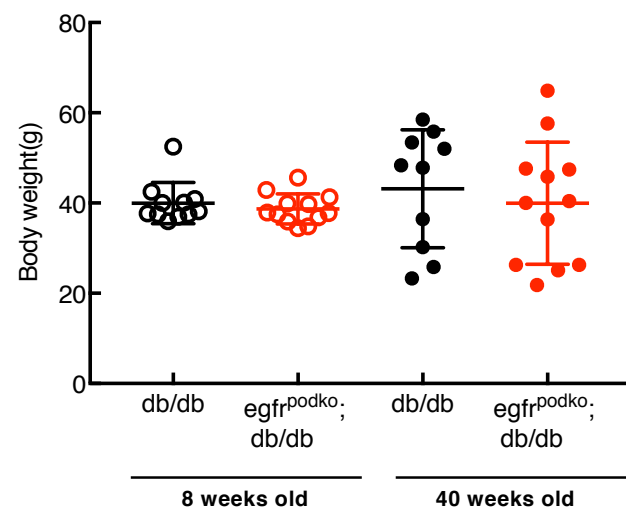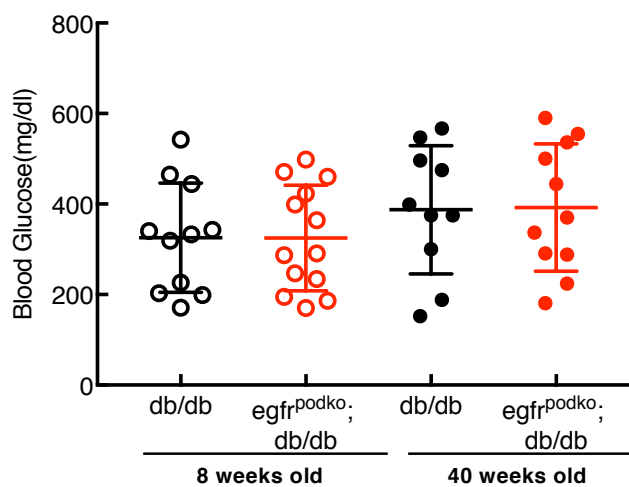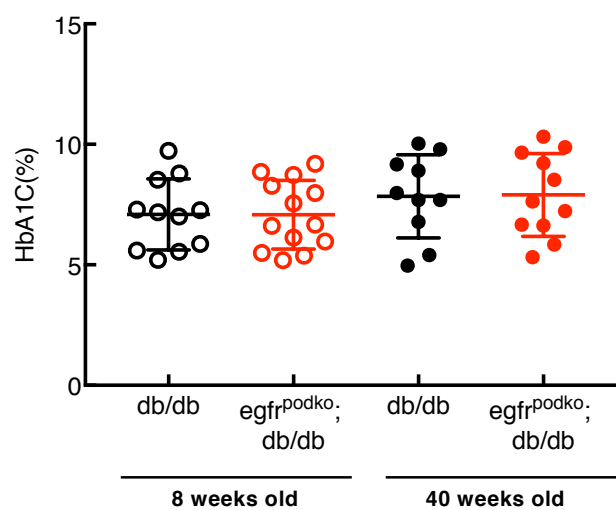

Supplemental Figure S3

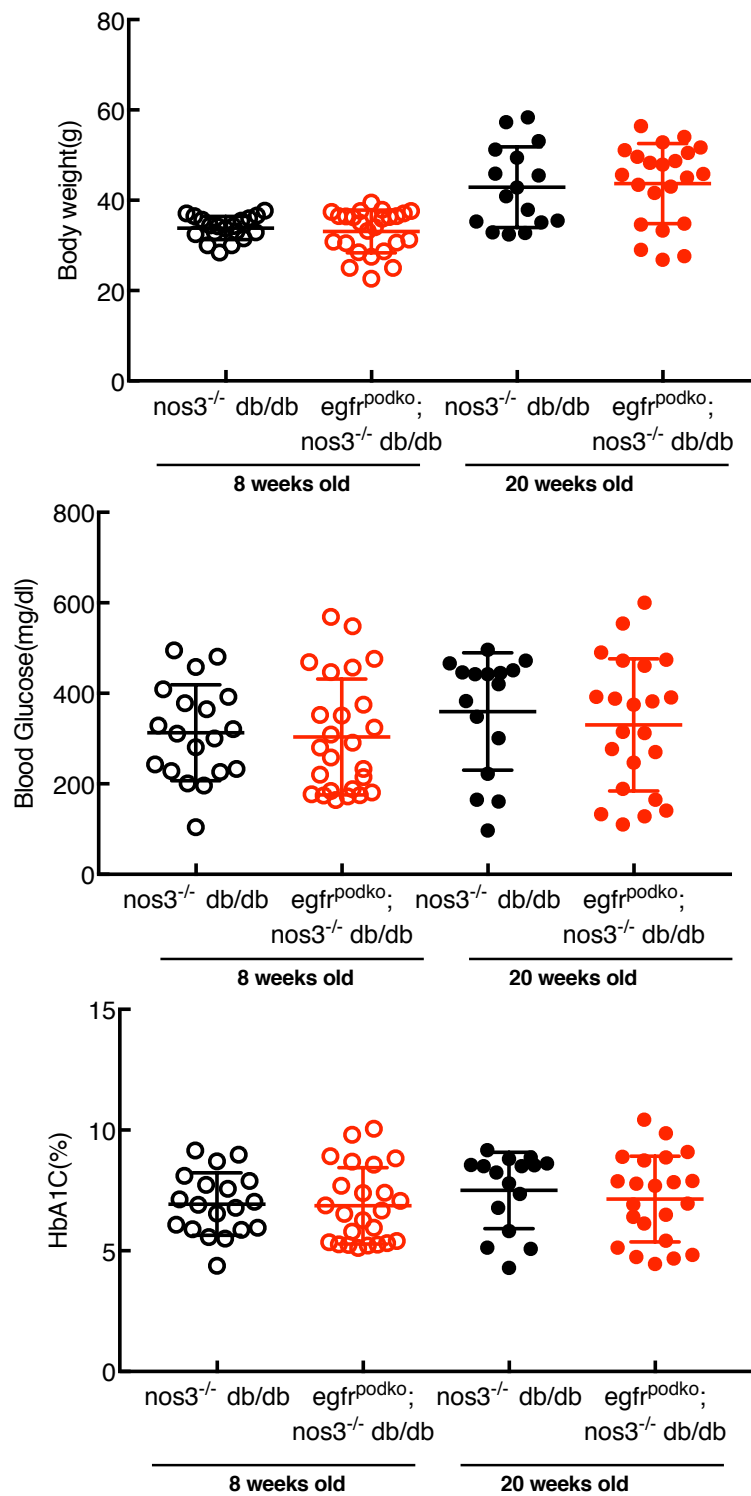

Supplemental Figure S4

***Nos3<sup>-/-</sup> db/db***

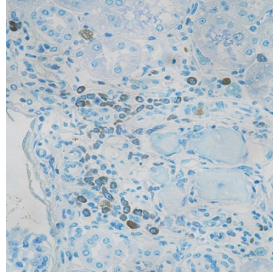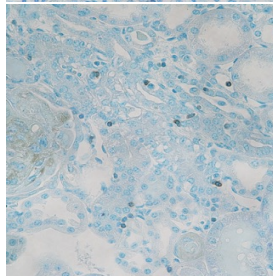

***Egfr<sup>podKO</sup>;Nos3<sup>-/-</sup> db/db***

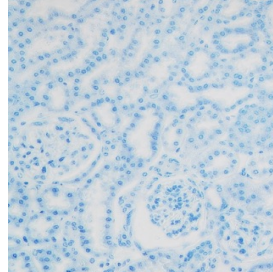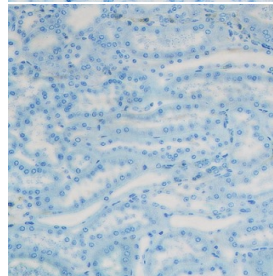

CD3, marker of lymphocytes, x 400.

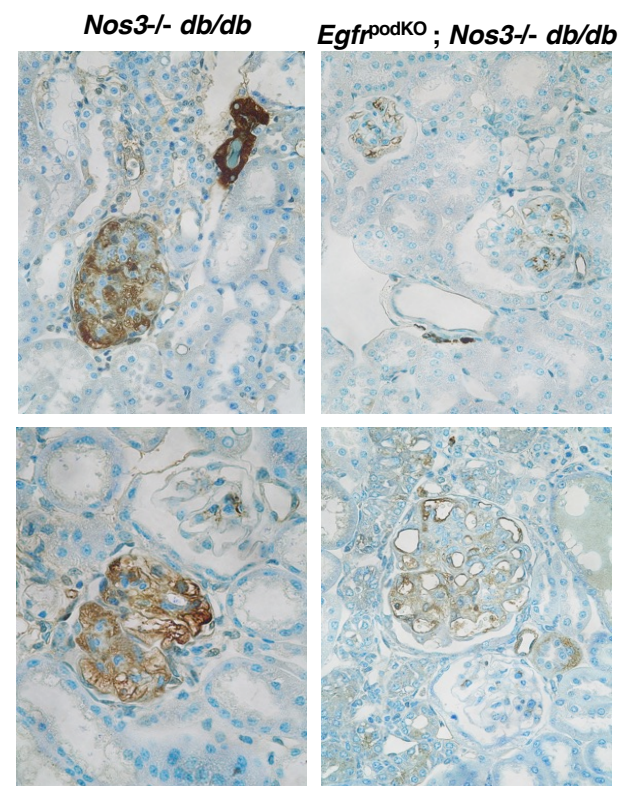

4-HNE staining, marker of oxidative stress, x 400.

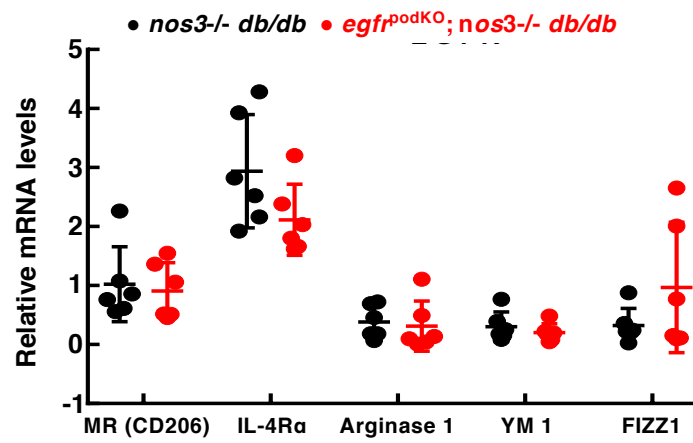

Supplemental Figure S7



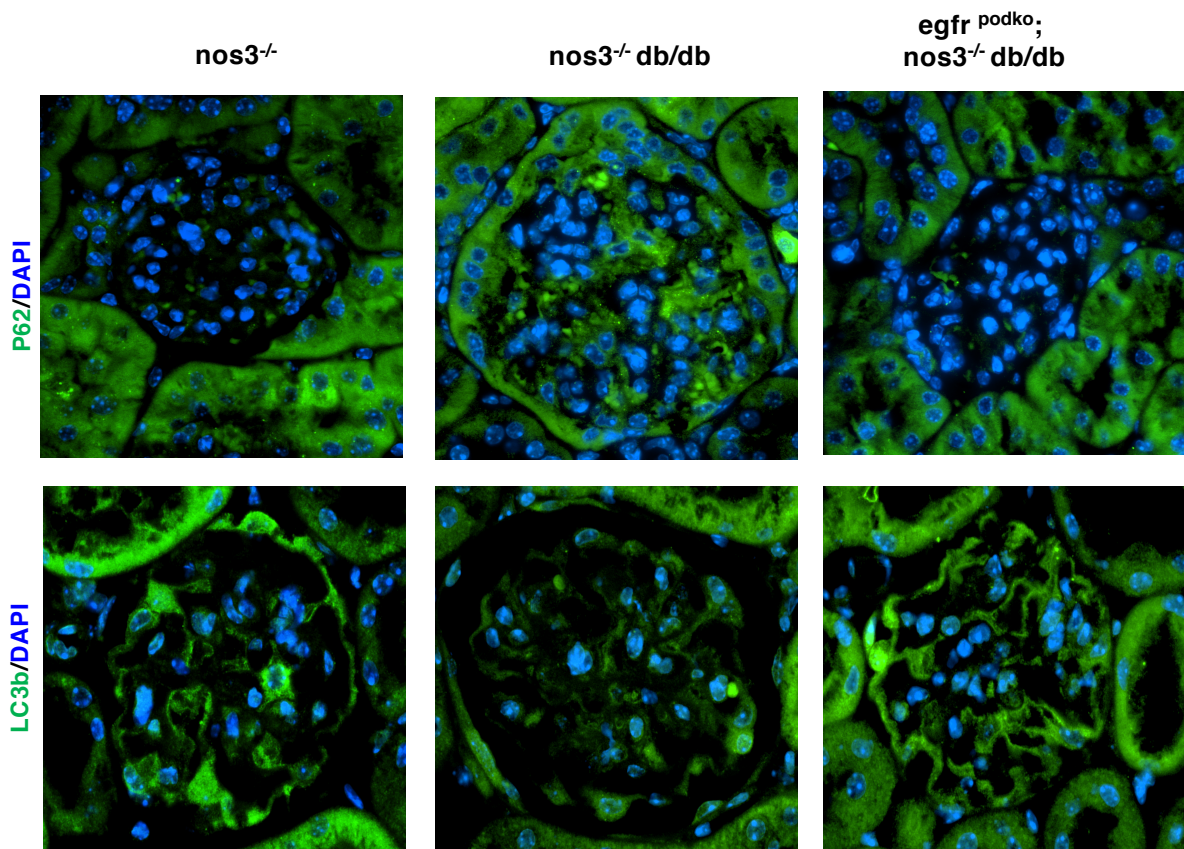

Supplemental Figure S8
